## Correction: TGF $\beta$ 1 in fibroblasts-derived exosomes promotes epithelial-mesenchymal transition of ovarian cancer cells

Wenqian Li<sup>1</sup>, Xiaoxue Zhang<sup>1</sup>, Ji Wang<sup>1</sup>, Mengchen Li<sup>1</sup>, Canhui Cao<sup>1</sup>, Jiahong Tan<sup>1</sup>, Ding Ma<sup>1</sup> and Qinglei Gao<sup>1</sup>

<sup>1</sup>Cancer Biology Research Center (Key Laboratory of The Ministry of Education), Tongji Hospital, Tongji Medical College, Huazhong University of Science and Technology, Wuhan, Hubei 430030, People's Republic of China

**Published:**

**Copyright:** © 2023 Li et al. This is an open access article distributed under the terms of the [Creative Commons Attribution License](#) (CC BY 3.0), which permits unrestricted use, distribution, and reproduction in any medium, provided the original author and source are credited.

**This article has been corrected:** In Figure 2B, the bottom panel image of the 'NOF exo' column is an accidental duplicate of the bottom panel image of the 'CAOV-3' column in Figure 4D. The corrected Figure 2, obtained using the original data, is shown below. The authors declare that these corrections do not change the results or conclusions of this paper.

Original article: Oncotarget. 2017; 8:96035–96047. <https://doi.org/10.18632/oncotarget.21635>

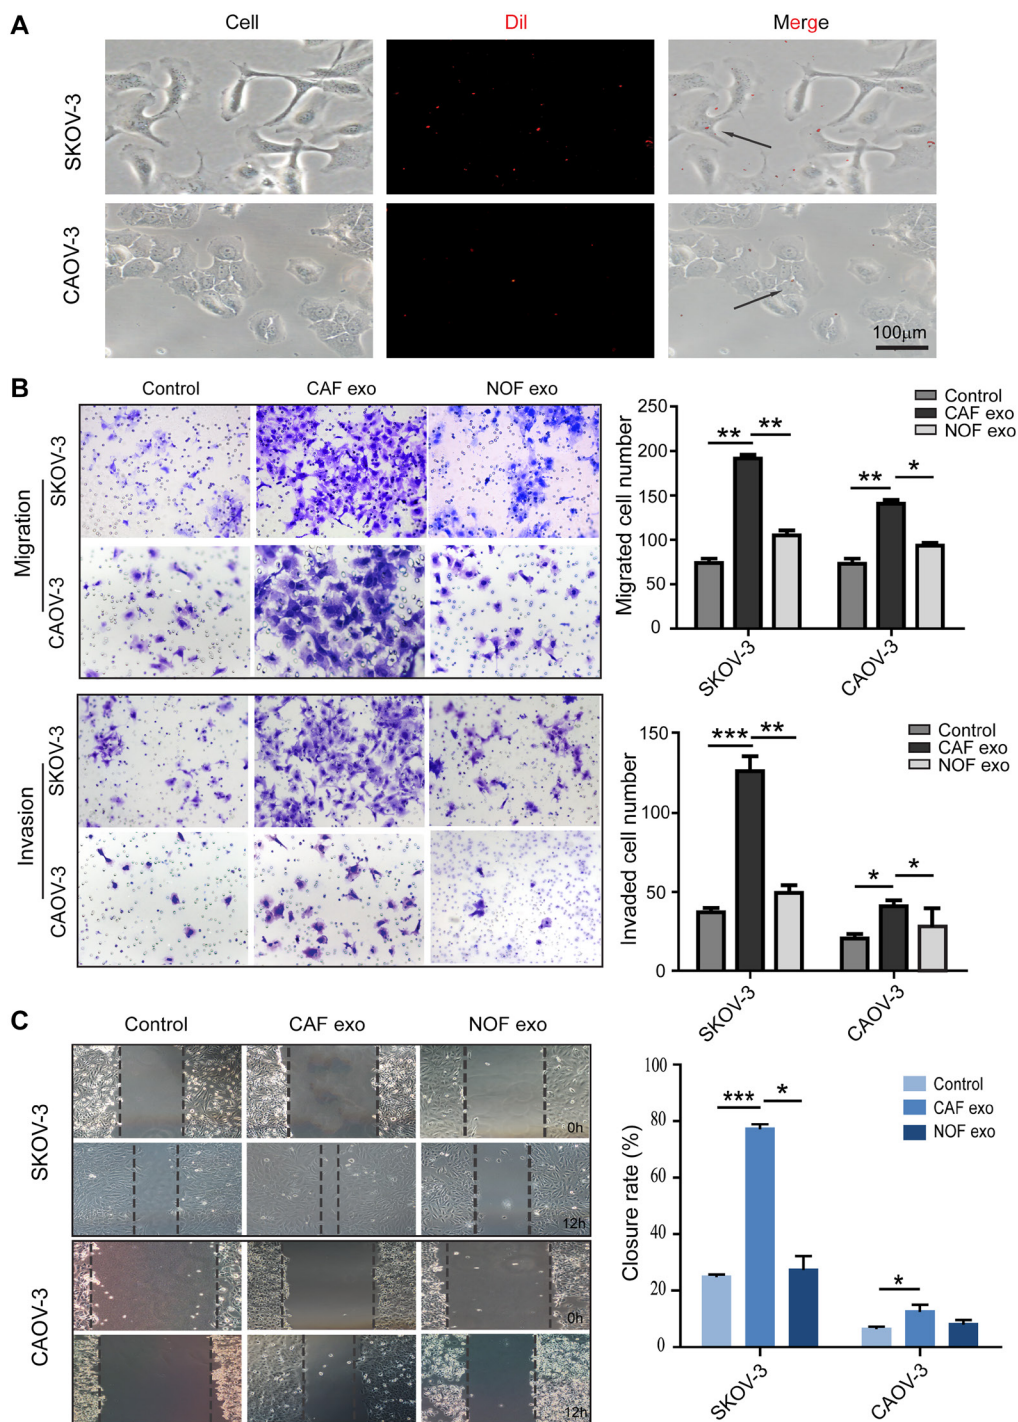

**Figure 2: Fibroblast-derived exosomes enter and stimulate migration and invasion of ovarian epithelial cell lines.** (A) Exosomes uptake experiment. SKOV-3 and CAOV-3 cells were cocultured with Dil labeled CAF-derived exosomes for 6 h. (B) The migration and invasion ability of exosome-treated SKOV-3 and CAOV-3 cells were determined using the Transwell assay. Patients CAF-derived exosomes induced significantly more migration ability and invasiveness than NOF-derived exosomes. Representative images were showed on the left (magnification,  $\times 200$ ), data analysis represented on the right. (C) Analysis of tumor cells migration by scratch assay, wound closure rate represent at least three experiments.  $*p < 0.05$ ,  $**p < 0.01$ ,  $***p < 0.001$ .
